# Supplementary material for: The global correlation between internal-tide generation and the depth-distribution of cold-water corals
Source: Copernicus journal article supplement (doi:10.5194/egusphere-2023-941), 2023-05-11
Supplement: Supplementary file [file egusphere-2023-941-AC1-supplement.zip]

**Table 1. The percentages of topography where the M2 (top) and K1 (bottom) internal tide is trapped, or where the reflection is supercritical, critical, or subcritical. We calculated the percentages for all parts on all transects ('all transects'), for the transect regions where internal tide generation peaks ('peaks'), for the coral locations using 30 arc-minute bathymetry ('Coral locations 30'), for coral locations using 1 arc-minute bathymetry ('Coral locations 1'), and for the global ocean using bathymetry at 1 arc-minute resolution ('Globally 1'). The mean and 95% confidence interval are obtained by bootstrapping with 1,000 repetitions.**

|                | M2            |             |       |             |                    |             |                   |             |            |             |
|----------------|---------------|-------------|-------|-------------|--------------------|-------------|-------------------|-------------|------------|-------------|
|                | All transects |             | Peaks |             | Coral locations 30 |             | Coral locations 1 |             | Globally 1 |             |
|                | mean          | 95%         | mean  | 95%         | mean               | 95%         | mean              | 95%         | mean       | 95%         |
| Trapped        |               |             |       |             |                    |             |                   |             |            |             |
| Super-critical | 1.0           | 1.0 – 1.0   | 4.5   | 3.5 – 5.5   | 2.7                | 2.6 – 2.8   | 66.9              | 66.2 – 67.5 | 9.4        | 9.4 – 9.4   |
| Critical       | 3.0           | 3.0 – 3.0   | 14.5  | 12.7 – 16.3 | 3.7                | 3.5 – 3.8   | 15.5              | 15.2 – 15.9 | 3.6        | 3.6 – 3.6   |
| Sub-critical   | 96.0          | 95.9 – 96.0 | 81.0  | 79.0 – 83.0 | 93.6               | 93.1 – 94.2 | 17.6              | 17.2 – 18.0 | 87.0       | 86.9 – 87.0 |
|                | K1            |             |       |             |                    |             |                   |             |            |             |
| Trapped        | 54.7          | 54.6 – 54.8 |       |             | 67.7               | 67.3 – 68.2 | 52.5              | 52.0 – 53.0 | 62.5       | 62.5 – 62.5 |
| Super-critical | 1.2           | 1.2 – 1.3   |       |             | 11.2               | 11.0 – 11.4 | 45.8              | 45.2 – 46.3 | 17.8       | 17.8 – 17.9 |
| Critical       | 6.6           | 6.5 – 6.6   |       |             | 5.9                | 5.7 – 6.1   | 1.2               | 1.1 – 1.3   | 7.0        | 7.0 – 7.1   |
| Sub-critical   | 37.5          | 37.4 – 37.6 |       |             | 15.2               | 14.9 – 15.4 | 0.5               | 0.4 – 0.6   | 12.6       | 12.6 – 12.6 |
